# Supplementary material for: Lignin Recovery from Black Liquor Using Integrated UF/NF Processes and Economic Analysis
Source: MDPI journal article supplement (doi:10.3390/membranes13020237), 2023-02-16
Supplement: s1 [file s1]

Supplementary material

# Lignin Recovery from Black Liquor Using Integrated UF/NF Processes and Economic Analysis

Manorma Sharma \*, Patrícia Alves and Licínio M. Gando-Ferreira \*

University of Coimbra, CIEPQPF, Department of Chemical Engineering, Faculty of Sciences and Technology, Pólo II, Rua Sílvio Lima, 3030-790 Coimbra, Portugal

\* Correspondence: manorma@eq.uc.pt (M.S.); lferreira@eq.uc.pt (L.M.G.-F.)

## 1. Composition of black liquor samples

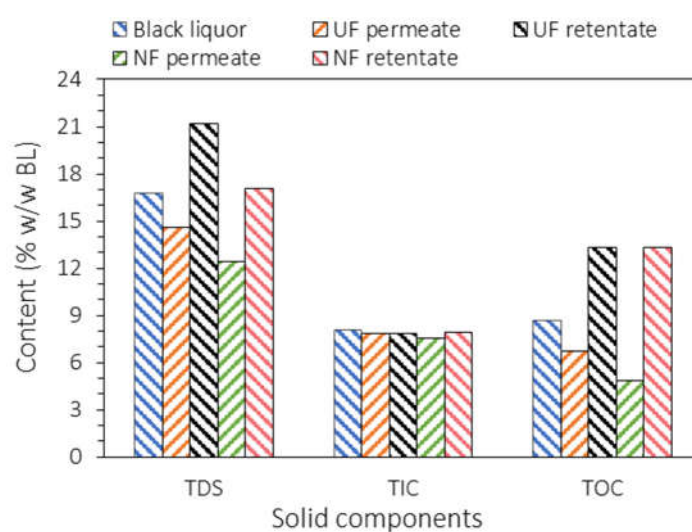

**Figure S1.** Composition of kraft black liquor samples observed before filtration and after UF and NF processes.

## 2. Proposed process flow diagram for integrated UF/NF process

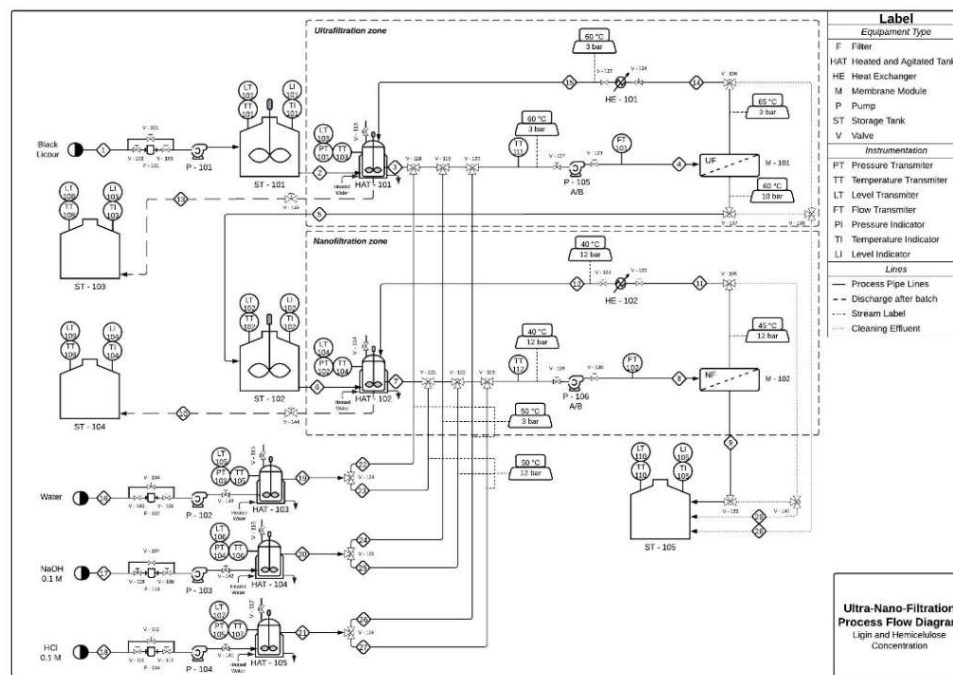

**Figure S2.** Process flow diagram for integrated UF/NF process implemented for separation of hem-celluloses and lignin from black liquor.
